# Supplementary material for: Intracellular fibril formation, calcification, and enrichment of chaperones, cytoskeletal, and intermediate filament proteins in the adult hippocampus CA1 following neonatal exposure to the nonprotein amino acid BMAA
Source: PubMed Central journal article supplement (PMC4335130; doi:10.1007/s00204-014-1262-2), 2014-05-06
Supplement: 204_2014_1262_MOESM1_ESM.pdf [file 204_2014_1262_MOESM1_ESM.pdf]

## Archives of Toxicology

### Intracellular fibril formation, calcification and enrichment of chaperones, cytoskeletal and intermediate filament proteins in the adult hippocampus CA1 following neonatal exposure to the non-protein amino acid BMAA

Oskar Karlsson\*, Anna-Lena Berg, Jörg Hanrieder, Gunnel Arnerup, Anna-Karin Lindström, Eva B Brittebo

\*Uppsala University, Department of Pharmaceutical Biosciences, Box 591, SE-751 24 Uppsala, Sweden, E-mail: Oskar.Karlsson@farmbio.uu.se, Fax: +46-18-4714253

### Supplementary Material

**Table 1** Details of primary and secondary antibodies, and detection systems used in the immunohistochemistry

| Primary Antibody/<br>dilution              | Manufacturer/<br>product number | Antigen retrieval               | Secondary antibody/<br>dilution                                          | Detection system                       |
|--------------------------------------------|---------------------------------|---------------------------------|--------------------------------------------------------------------------|----------------------------------------|
| Alpha-synuclein<br>1/500                   | Abcam/ ab87599                  | NA                              | OmniMap Rb (Roche)/<br>prediluted                                        | Chromo-Map DAB<br>kit (Ventana/ Roche) |
| GFAP<br>1/2000                             | DAKO/ Z0334                     | Protease 1, 8 min               | Goat anti Rabbit biotin<br>immunoglobulin (prod no<br>E0432 Dako)/ 1/150 | DAB-Map kit<br>(Ventana/ Roche)        |
| Isolectin B4<br>Biotin conjugated<br>1/100 | Vector/ B-1205                  | Mw 10 min pH6 citrate<br>buffer | NA                                                                       | Streptavidin HRP<br>(Dako)             |
| TARDBP (TDP-43)<br>1/1000                  | Abcam/ ab42474                  | Protease 2, 8 min               | OmniMap Rb (Roche)/<br>prediluted                                        | Chromo-Map DAB<br>kit (Ventana/ Roche) |
| Tau protein<br>1/2000                      | Invitrogen/ AHB0042             | SCC1                            | Goat anti Mouse biotin<br>immunoglobulin (prod no<br>E0433 Dako)/ 1/250  | DAB-Map kit<br>(Ventana/ Roche)        |
| Tubulin                                    | Abcam/ ab6046                   | SCC2                            | OmniMap Rb (Roche)/<br>prediluted                                        | Chromo-Map DAB<br>kit (Ventana/ Roche) |
| Ubiquitin<br>1/100                         | Abcam/ ab7780                   | SCC1                            | OmniMap Rb (Roche)/<br>prediluted                                        | Chromo-Map DAB<br>kit (Ventana/ Roche) |

Supplemental Table 2: Proteins enriched in of histologically altered hippocampal CA1 area\*

| Accession | Proteins                                                              | MW [kDa] | Control <sup>1</sup> | Sample <sup>1</sup> | Abundance ratio      |
|-----------|-----------------------------------------------------------------------|----------|----------------------|---------------------|----------------------|
| G6S3A5    | Plectin 1 [G6S3A5_RAT]                                                | 519.7    | 2                    | 48                  | 24.0                 |
| P31000    | Vimentin [VIME_RAT]                                                   | 53.7     | 3                    | 68                  | 22.7                 |
| A1E252    | Glial fibrillary acidic protein (GFAP) epsilon, Fragment [A1E252_RAT] | 18.5     | 1                    | 16                  | 16.0                 |
| D3ZE14    | Uncharacterized protein [D3ZE14_RAT]                                  | 46.0     | 1                    | 10                  | 10.0                 |
| P15865    | Histone H1.4 [H14_RAT]                                                | 22.0     | 1                    | 9                   | 9.0                  |
| Q00715    | Histone H2B type 1 [H2B1_RAT]                                         | 14.0     | 2                    | 17                  | 8.5                  |
| P47819    | Glial fibrillary acidic protein [GFAP_RAT]                            | 49.9     | 17                   | 133                 | 7.8                  |
| P02650    | Apolipoprotein E [APOE_RAT]                                           | 35.7     | 1                    | 7                   | 7.0                  |
| P37397    | Calponin-3 [CNN3_RAT]                                                 | 36.4     | 1                    | 6                   | 6.0                  |
| Q66HD0    | Endoplasmic [GRP94] [ENPL_RAT]                                        | 92.7     | 1                    | 6                   | 6.0                  |
| P08050    | Gap junction alpha-1 protein (connexin 43) [CXA1_RAT]                 | 43.0     | 1                    | 6                   | 6.0                  |
| D3ZJ08    | Histone H3 [D3ZJ08_RAT]                                               | 15.4     | 1                    | 6                   | 6.0                  |
| P04764    | Alpha-enolase [ENOA_RAT]                                              | 47.1     | 2                    | 11                  | 5.5                  |
| O08651    | D-3-phosphoglycerate dehydrogenase [SERA_RAT]                         | 56.5     | 1                    | 5                   | 5.0                  |
| P06761    | 78 kDa glucose-regulated protein [GRP78_RAT]                          | 72.3     | 2                    | 8                   | 4.0                  |
| D3ZH77    | Microtubule-associated protein (Map4) [D3ZH77_RAT]                    | 95.0     | 2                    | 8                   | 4.0                  |
| Q6IFZ4    | Type II keratin Kb15 [Q6IFZ4_RAT]                                     | 57.6     | 1                    | 4                   | 4.0                  |
| P07335    | Creatine kinase B-type [KCRB_RAT]                                     | 42.7     | 9                    | 33                  | 3.7                  |
| F42123    | L-lactate dehydrogenase B chain [LDHB_RAT]                            | 36.6     | 2                    | 7                   | 3.5                  |
| P16617    | Phosphoglycerate kinase 1 [PGK1_RAT]                                  | 44.5     | 2                    | 7                   | 3.5                  |
| Q6P750    | Pyruvate kinase [Q6P750_RAT]                                          | 52.9     | 6                    | 19                  | 3.2                  |
| P35213    | 14-3-3 protein beta/alpha (Ywhab) [1433B_RAT]                         | 28.0     | 1                    | 3                   | 3.0                  |
| P61983    | 14-3-3 protein gamma (Ywhag) [1433G_RAT]                              | 28.3     | 1                    | 3                   | 3.0                  |
| P38650    | Cytoplasmic dynein 1 heavy chain [DYHC1_RAT]                          | 531.9    | 1                    | 3                   | 3.0                  |
| D3ZC88    | Elongation factor 1-alpha [D3ZC88_RAT]                                | 50.1     | 4                    | 12                  | 3.0                  |
| P05197    | Elongation factor 2 [EF2_RAT]                                         | 95.2     | 1                    | 3                   | 3.0                  |
| P61980    | Heterogeneous nuclear ribonucleoprotein K [HNRPK_RAT]                 | 50.9     | 1                    | 3                   | 3.0                  |
| F1LMU0    | Myosin-4 [F1LMU0_RAT]                                                 | 222.7    | 2                    | 6                   | 3.0                  |
| B1WBUB9   | Phosphorylase [B1WBUB9_RAT]                                           | 97.3     | 1                    | 3                   | 3.0                  |
| P67779    | Prohibitin [PHB_RAT]                                                  | 29.8     | 1                    | 3                   | 3.0                  |
| B0K023    | Rpl7 protein, Fragment [B0K023_RAT]                                   | 26.2     | 1                    | 3                   | 3.0                  |
| Q8CFD0    | Sideroflexin-5 [SFXN5_RAT]                                            | 37.3     | 1                    | 3                   | 3.0                  |
| Q3ZB99    | Tight junction protein 2 [Q3ZB99_RAT]                                 | 131.3    | 1                    | 3                   | 3.0                  |
| D3ZTF3    | Uncharacterized protein [D3ZTF3_RAT]                                  | 32.9     | 1                    | 3                   | 3.0                  |
| O88767    | Protein DJ-1 (Park7) [PARK7_RAT]                                      | 20.0     | 2                    | 5                   | 2.5                  |
| P09117    | Fructose-bisphosphate aldolase C [ALDOC_RAT]                          | 39.3     | 7                    | 17                  | 2.4                  |
| P11980    | Pyruvate kinase isozymes M1/M2 [KPYM_RAT]                             | 57.8     | 9                    | 21                  | 2.3                  |
| P04797    | Glyceraldehyde-3-phosphate dehydrogenase [G3P_RAT]                    | 35.8     | 12                   | 26                  | 2.2                  |
| P30835    | 6-phosphofructokinase [K6PL_RAT]                                      | 85.3     | 2                    | 4                   | 2.0                  |
| D3Z299    | Alpha-adducin [D3Z299_RAT]                                            | 73.1     | 1                    | 2                   | 2.0                  |
| F1LPM4    | Amine oxidase [flavin-containing] B (Maob) [F1LPM4_RAT]               | 56.9     | 1                    | 2                   | 2.0                  |
| G3V936    | Citrate synthase [G3V936_RAT]                                         | 51.8     | 1                    | 2                   | 2.0                  |
| Q7M0E3    | Actin-depolymerizing factor (Destrin) [DEST_RAT]                      | 18.5     | 2                    | 4                   | 2.0                  |
| Q62952    | Dihydropyrimidinase-related protein 3 [DPYL3_RAT]                     | 61.9     | 2                    | 4                   | 2.0                  |
| Q8JHL4    | Drebrin-like protein [DBNL_RAT]                                       | 48.6     | 1                    | 2                   | 2.0                  |
| G3V6R2    | Excitatory amino acid transporter (EAT2) 2 [G3V6R2_RAT]               | 60.9     | 3                    | 6                   | 2.0                  |
| B4F772    | Heat shock 70 kDa protein [B4F772_RAT]                                | 94.2     | 1                    | 2                   | 2.0                  |
| P10111    | Peptidyl-prolyl cis-trans isomerase A [PIPA_RAT]                      | 17.9     | 1                    | 2                   | 2.0                  |
| P35704    | Peroxiredoxin-2 [PRDX2_RAT]                                           | 21.8     | 1                    | 2                   | 2.0                  |
| F1LRX5    | Protein Sptbn1, Fragment [F1LRX5_RAT]                                 | 267.7    | 5                    | 10                  | 2.0                  |
| P52873    | Pyruvate carboxylase, mitochondrial [PYC_RAT]                         | 129.7    | 2                    | 4                   | 2.0                  |
| Q64548    | Reticulon-1 [RTN1_RAT]                                                | 83.0     | 1                    | 2                   | 2.0                  |
| Q64428    | Trifunctional enzyme subunit alpha, mitochondrial [ECHA_RAT]          | 82.6     | 1                    | 2                   | 2.0                  |
| D4A786    | Uncharacterized protein [D4A786_RAT]                                  | 6.4      | 1                    | 2                   | 2.0                  |
| P60711    | Actin, cytoplasmic 1 [ACTB_RAT]                                       | 41.7     | 34                   | 67                  | 2.0                  |
| P68035    | Actin, alpha cardiac muscle 1 [ACTC_RAT]                              | 42.0     | 26                   | 47                  | 1.8                  |
| P62250    | 40S ribosomal protein S16 [RS16_RAT]                                  | 16.4     | 2                    | 2                   | Exclusively detected |
| P62909    | 40S ribosomal protein S3 [RS3_RAT]                                    | 26.7     | 3                    | 3                   | Exclusively detected |
| P62755    | 40S ribosomal protein S6 [RS6_RAT]                                    | 28.7     | 2                    | 2                   | Exclusively detected |
| P62243    | 40S ribosomal protein S8 [RS8_RAT]                                    | 24.2     | 2                    | 2                   | Exclusively detected |
| D3ZD02    | 60S ribosomal protein L13 [D3ZD02_RAT]                                | 24.0     | 3                    | 3                   | Exclusively detected |
| P50878    | 60S ribosomal protein L4 [RL4_RAT]                                    | 47.2     | 2                    | 2                   | Exclusively detected |
| F2Z3S2    | 60S ribosomal protein L7a, Fragment [F2Z3S2_RAT]                      | 29.8     | 3                    | 3                   | Exclusively detected |
| O70371    | Annexin, Fragment (Anxa5) [O70371_RAT]                                | 33.9     | 3                    | 3                   | Exclusively detected |
| P07150    | Annexin A1 [ANXA1_RAT]                                                | 38.8     | 2                    | 2                   | Exclusively detected |
| Q07936    | Annexin A2 [ANXA2_RAT]                                                | 38.7     | 4                    | 4                   | Exclusively detected |
| P14669    | Annexin A3 [ANXA3_RAT]                                                | 36.3     | 11                   | 11                  | Exclusively detected |
| P55260    | Annexin A4 [ANXA4_RAT]                                                | 35.8     | 4                    | 4                   | Exclusively detected |
| P15429    | Beta-enolase [ENOB_RAT]                                               | 47.0     | 7                    | 7                   | Exclusively detected |
| P09456    | cAMP-dependent protein kinase regulatory subunit (Prkar1a) [KAP0_RAT] | 43.1     | 4                    | 4                   | Exclusively detected |
| G3V7K3    | Ceruloplasmin [G3V7K3_RAT]                                            | 120.6    | 2                    | 2                   | Exclusively detected |
| D4ACB8    | Chaperonin subunit 8 (Cct8) [D4ACB8_RAT]                              | 59.6     | 3                    | 3                   | Exclusively detected |
| G3V836    | Clusterin (apolipoprotein J) [G3V836_RAT]                             | 51.4     | 3                    | 3                   | Exclusively detected |
| P47875    | Cysteine and glycine-rich protein 1 [CSR1_RAT]                        | 20.6     | 2                    | 2                   | Exclusively detected |
| P36201    | Cysteine-rich protein 2 [CRIP2_RAT]                                   | 22.7     | 2                    | 2                   | Exclusively detected |
| Q68FS4    | Cytosol aminopeptidase [AMPL_RAT]                                     | 56.1     | 3                    | 3                   | Exclusively detected |
| Q9J166    | Electrogenic sodium bicarbonate cotransporter 1 [S4A4_RAT]            | 121.3    | 2                    | 2                   | Exclusively detected |
| G3V732    | Elongation factor 1-delta [G3V732_RAT]                                | 28.7     | 2                    | 2                   | Exclusively detected |
| G3V846    | Excitatory amino acid transporter 1 [G3V846_RAT]                      | 59.6     | 2                    | 2                   | Exclusively detected |
| P55051    | Fatty acid-binding protein, brain [FABP7_RAT]                         | 14.9     | 6                    | 6                   | Exclusively detected |
| D4A3F5    | G protein-coupled receptor (Gprc5b) [D4A3F5_RAT]                      | 44.0     | 6                    | 6                   | Exclusively detected |
| P04904    | Glutathione S-transferase alpha-3 [GSTA3_RAT]                         | 25.3     | 5                    | 5                   | Exclusively detected |
| B6DYQ1    | Glutathione S-transferase mu 1 [B6DYQ1_RAT]                           | 26.0     | 6                    | 6                   | Exclusively detected |
| D3ZNT4    | Heat shock protein beta-1 (Hsp27) [D3ZNT4_RAT]                        | 21.7     | 12                   | 12                  | Exclusively detected |
| Q4V8K6    | Heterogeneous nuclear ribonucleoprotein C (C1/C2) [Q4V8K6_RAT]        | 32.8     | 2                    | 2                   | Exclusively detected |
| G3V8L3    | Lamin A, isoform CRA_b [G3V8L3_RAT]                                   | 74.3     | 3                    | 3                   | Exclusively detected |
| Q63016    | Large neutral amino acids transporter small subunit 1 [LAT1_RAT]      | 55.9     | 2                    | 2                   | Exclusively detected |
| Q6P9U7    | L-lactate dehydrogenase (Ldh) [Q6P9U7_RAT]                            | 29.8     | 2                    | 2                   | Exclusively detected |
| Q9ZXP0    | L-xylulose reductase [DCXR_RAT]                                       | 25.7     | 3                    | 3                   | Exclusively detected |
| Q6AYC4    | Macrophage-capping protein [CAPG_RAT]                                 | 38.8     | 3                    | 3                   | Exclusively detected |
| B2GV33    | Maoa protein, Fragment (Maoa) [B2GV33_RAT]                            | 58.8     | 3                    | 3                   | Exclusively detected |
| P08494    | Matrix Gla protein [MGP_RAT]                                          | 12.0     | 2                    | 2                   | Exclusively detected |
| D4ABB2    | Mic1 [D4ABB2_RAT]                                                     | 44.3     | 2                    | 2                   | Exclusively detected |
| F1M047    | Mitogen-activated protein kinase 3, Fragment (Mapk3) [F1M047_RAT]     | 42.0     | 3                    | 3                   | Exclusively detected |
| Q63716    | Peroxiredoxin-1 [PRDX1_RAT]                                           | 22.1     | 4                    | 4                   | Exclusively detected |
| Q35244    | Peroxiredoxin-6 [PRDX6_RAT]                                           | 24.8     | 2                    | 2                   | Exclusively detected |
| D3ZU02    | Phosphoglucosyltransferase 3 (Predicted), isoform CRA_d [D3ZU02_RAT]  | 55.2     | 2                    | 2                   | Exclusively detected |
| G3V8L9    | Polymerase I and transcript release factor (Predicted) [G3V8L9_RAT]   | 43.9     | 2                    | 2                   | Exclusively detected |
| D4AC23    | Protein Cct7 [D4AC23_RAT]                                             | 59.6     | 2                    | 2                   | Exclusively detected |
| P11598    | Protein disulfide-isomerase A3 [PDIA3_RAT]                            | 56.6     | 2                    | 2                   | Exclusively detected |
| F1M5V2    | Protein Glipr2, Fragment (GAPR-1) [F1M5V2_RAT]                        | 16.7     | 6                    | 6                   | Exclusively detected |
| F1LV13    | Protein Hnrpm [F1LV13_RAT]                                            | 73.7     | 4                    | 4                   | Exclusively detected |
| D3ZS68    | Protein Pcbp1 [D3ZS68_RAT]                                            | 37.5     | 3                    | 3                   | Exclusively detected |
| D3ZHJ1    | Protein Psat1 [D3ZHJ1_RAT]                                            | 40.2     | 3                    | 3                   | Exclusively detected |
| F1LQW3    | Protein Slpq, Fragment [F1LQW3_RAT]                                   | 65.7     | 3                    | 3                   | Exclusively detected |
| D3ZGP5    | Protein Tardbp (TDP-43) [D3ZGP5_RAT]                                  | 44.5     | 2                    | 2                   | Exclusively detected |
| P50399    | Rab GDP dissociation inhibitor beta [GDIB_RAT]                        | 50.5     | 4                    | 4                   | Exclusively detected |
| Q5PQK5    | Radixin [Q5PQK5_RAT]                                                  | 68.5     | 2                    | 2                   | Exclusively detected |
| Q5X173    | Rho GDP-dissociation inhibitor 1 [GDIR1_RAT]                          | 23.4     | 2                    | 2                   | Exclusively detected |
| B0BN81    | Ribosomal protein S5, isoform CRA_b [B0BN81_RAT]                      | 22.9     | 2                    | 2                   | Exclusively detected |
| P29457    | Serpin H1 [SERPH_RAT]                                                 | 46.5     | 2                    | 2                   | Exclusively detected |
| Q63555    | SF120 (Hnmpu) [Q63555_RAT]                                            | 87.7     | 3                    | 3                   | Exclusively detected |
| Q6LDS4    | Superoxide dismutase [Cu-Zn] (Sod1) [Q6LDS4_RAT]                      | 15.7     | 2                    | 2                   | Exclusively detected |
| Q7TFB1    | T-complex protein 1 subunit delta (Cot4) [TCPD_RAT]                   | 58.1     | 2                    | 2                   | Exclusively detected |
| Q06F00    | T-complex protein 1 subunit epsilon (Cot5) [TCPE_RAT]                 | 59.5     | 2                    | 2                   | Exclusively detected |
| Q2LAP6    | Testin [TES_RAT]                                                      | 47.6     | 2                    | 2                   | Exclusively detected |
| Q498D4    | Tin1 protein [Q498D4_RAT]                                             | 161.9    | 2                    | 2                   | Exclusively detected |
| P37805    | Transgelin-3 [TAGL3_RAT]                                              | 22.5     | 2                    | 2                   | Exclusively detected |
| P50137    | Transketolase [TKT_RAT]                                               | 67.6     | 2                    | 2                   | Exclusively detected |
| F1LP60    | Uncharacterized protein, Fragment [F1LP60_RAT]                        | 67.6     | 2                    | 2                   | Exclusively detected |

\* A neonatal rat on PND 9-10 was injected sc with BMAA (460 mg/kg) and sacrificed 6 months later. Cryo-sections were used for laser capture microdissection and LC-MS/MS of the hippocampal CA1. The CA1 sample containing birefringent material was compared with an adjacent normal tissue. <sup>1</sup>Number of different peptides detected for each protein (indicative of protein abundance).
